# Supplementary material for: Effects of thyroid hormone on HSV-1 gene regulation: implications in the control of viral latency and reactivation
Source: Springer Nature journal article supplement (doi:10.1186/2045-3701-1-24), 2011-01-01
Supplement: 13578_2011_25_MOESM1_ESM.pdf [file 13578_2011_25_MOESM1_ESM.pdf]

Consensus TRE
   
 AGGT(G/C)AN<sub>x</sub>T(C/G)ACCT

**TSH $\alpha$  TRE**

TATA box: TATAAAA

TRE: GCAGGTGAGGACTT

TRE: CATTAACTGCAGTTACTG

Transcription initiation: →

**HSV-1 TK TRE**

TATA box: TATTAAGGCCA

TRE: cacacg

TRE: TCACCTCGAATACCG

Transcription initiation: →
