# Supplementary material for: Effects of thyroid hormone on HSV-1 gene regulation: implications in the control of viral latency and reactivation
Source: Springer Nature journal article supplement (doi:10.1186/2045-3701-1-24), 2011-01-01
Supplement: 13578_2011_25_MOESM2_ESM.pdf [file 13578_2011_25_MOESM2_ESM.pdf]

N2a cells

N2aTR $\beta$  cells

1. TH treatment for 2 days
2. Infection
3. TH treatment for 5 days, fresh media added daily

Cells washed /replaced with fresh media at Day 5

Cell media with TH

Cell media without TH (TH washout)

2 days

2 days

Media collected for plaque assays at Day 7
