# Supplementary figures and images for: Effects of thyroid hormone on HSV-1 gene regulation: implications in the control of viral latency and reactivation
Source: Springer Nature journal article supplement (doi:10.1186/2045-3701-1-24), 2011-01-01

## Liganded TR/RXR

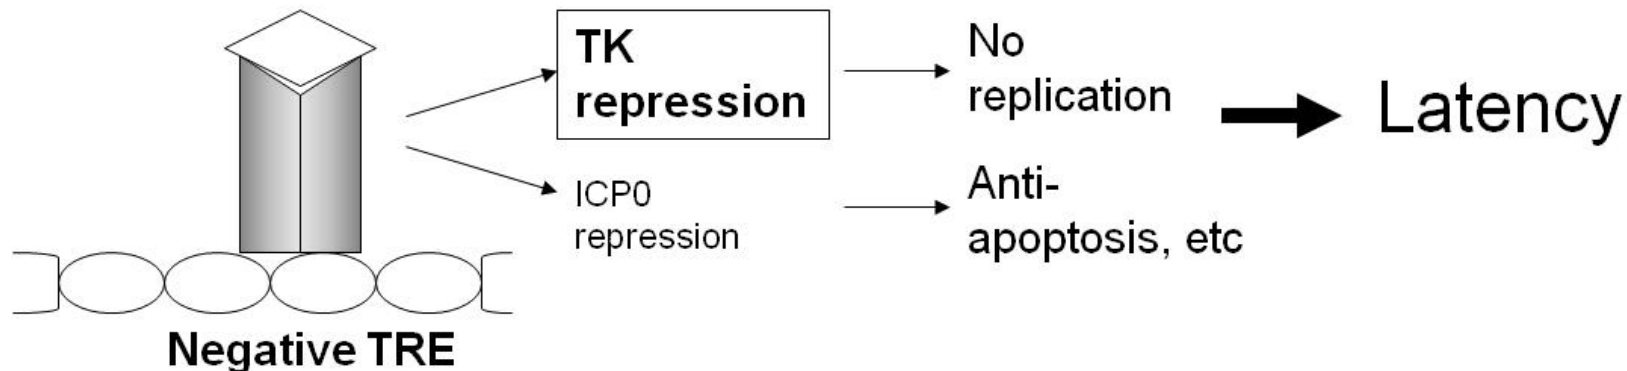

## Unliganded TR/RXR

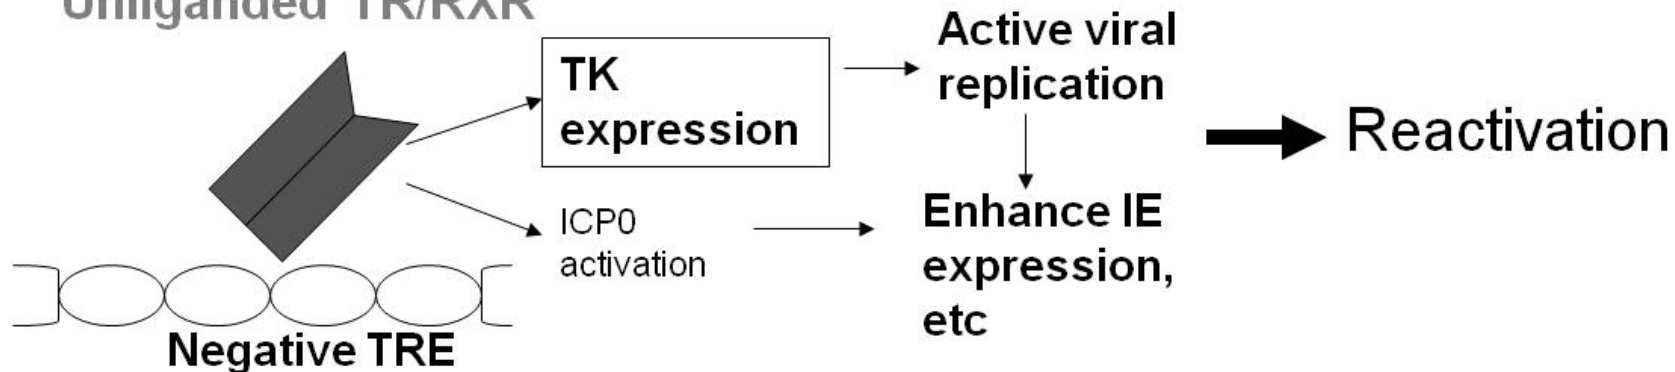

Supplement: 13578_2011_25_MOESM3_ESM.pdf [file 13578_2011_25_MOESM3_ESM.pdf]
